# Supplementary material for: Absolute and relative reliability of SCRuM test battery components assembled for schoolboy rugby players playing competitive rugby in low-resource settings: A pragmatic in-season test-retest approach
Source: PubMed Central journal article supplement (PMC10883676; doi:10.17159/2078-516x/2021/v33i1a12220), 2021-02-15
Supplement: 2078-516X-33-v33i1a12220-s001.pdf [file 2078-516X-33-v33i1a12220-s001.pdf]

# Absolute and relative reliability of *SCRuM* test battery components assembled for schoolboy rugby players playing competitive rugby in low-resource settings: A pragmatic in-season test-retest approach

Supplementary file 1: Order of the *SCRuM* tests performed during test-retest reliability study for elite Under 19 schoolboy rugby players

| Group               | Week   | Monday         | Tuesday  | Wednesday | Thursday | Friday  | Saturday | Sunday |
|---------------------|--------|----------------|----------|-----------|----------|---------|----------|--------|
| Elite U19<br>(n=41) | Week 1 | Body mass      | Yo-Yo    | 1RM BP    | Speed    | RHIE    | Match    | Rest   |
|                     |        | Height         | 2kg MBCT | WSLG      | SR       | Push Up |          |        |
|                     |        | 7 Skin folds   |          | 1RM BS    | L-run    |         |          |        |
|                     |        | Sitting height |          | VJ        |          |         |          |        |
|                     | Week 2 | Body mass      | Yo-Yo    | 1RM BP    | Speed    | RHIE    | Match    | Rest   |
|                     |        | Height         | 2kg MBCT | WSLG      | SR       | Push Up |          |        |
|                     |        | 7 Skin folds   |          | 1RM BS    | L-run    |         |          |        |
|                     |        | Sitting height |          | VJ        |          |         |          |        |
|                     | Week 3 | Tackling       | Passing  |           | Catching |         | Match    | Rest   |
|                     | Week 4 | Tackling       | Passing  |           | Catching |         | Match    | Rest   |

Yo-Yo, Yo-Yo Intermittent Recovery Level 1 Test; 2kg MBCT, 2kg medicine ball chest throw tests; 1RM BP, One repetition maximum bench press test; 1RM BS, One repetition maximum back squat test; WSLG, Wall Sit Leg Strength test; VJ, Vertical Jump test; SR, Sit-and-Reach test; Push Up, 60s push up test; RHIE, Repeated High Intensity Exercise Performance Ability test; Match, Represents competitive match; 7 skin folds, biceps, triceps, subscapular, suprailiac, abdomen, thigh, and calf measures.; Tackling, Tackling proficiency test; Passing, Passing ability and passing for accuracy for 7m test; Catching, Running and Catching Ability test.
